# Supplementary material for: Association of Prenatal, Early Postnatal, or Current Exposure to Secondhand Smoke With Attention-Deficit/Hyperactivity Disorder Symptoms in Children
Source: PubMed Central journal article supplement (PMC8138689; doi:10.1001/jamanetworkopen.2021.10931), 2021-05-20
Supplement: jamanetwopen-e2110931-s001.pdf [file jamanetwopen-e2110931-s001.pdf]

## Supplementary Online Content

Lin LZ, Xu SL, Wu QZ, et al. Association of prenatal, early postnatal, or current exposure to secondhand smoke with attention-deficit/hyperactivity disorder symptoms in children. *JAMA Network Open*. 2021;4(5):e2110931. doi:10.1001/jamanetworkopen.2021.10931

**eTable 1.** Summaries of Previous Observational Studies Regarding the Associations of SHS Exposure With ADHD Symptoms and Subtypes in Children Population

**eTable 2.** The Associations of SHS Exposure With ADHD Symptoms and Subtypes in School-Aged Children (6-18 Years) Using the Cutoff of C-ASQ

**eTable 3.** The Associations of SHS Exposure From Pregnancy to Childhood With ADHD Symptoms and Subtypes in School-Aged Children (6-18 Years) Using DSM-5 Criteria

**eTable 4.** The Associations of SHS Exposure With ADHD Symptoms and Subtypes In Different Timing In School-Aged Children (6-18 Years) Using DSM-5 Criteria

**eTable 5.** The Associations of Current Paternal Smoking and ADHD Symptoms and Subtypes in School-Aged Children (6-18 Years) Using DSM-5 Criteria

**eTable 6.** The Associations of SHS Exposure From Pregnancy to Childhood With ADHD Symptoms and Subtypes in School-Aged Children (6-18 Years) Using the Continuous Scores of the Symptom Inventory Scale of ADHD and C-ASQ

**eTable 7.** The Associations of SHS Exposure With ADHD Symptoms and Subtypes in Different Timing in School-Aged Children (6-18 Years) Using the Continuous Scores of the Symptom Inventory Scale of ADHD and C-ASQ

**eTable 8.** The Associations of Current Paternal Smoking and ADHD Symptoms and Subtypes in School-Aged Children (6-18 Years) Using the Continuous Scores of the Symptom Inventory Scale of ADHD and C-ASQ

**eTable 9.** The Associations of SHS Exposure in Different Timing With ADHD Symptom and Subtypes in School-Aged Children (6-18 Years)

This supplementary material has been provided by the authors to give readers additional information about their work.

**eTable 1. Summaries of Previous Observational Studies Regarding the Associations of SHS Exposure With ADHD Symptoms and Subtypes in Children Population**

| Author                       | Study Period   | Sample Size                         | Location              | Outcomes                         | Exposure                   |                                        | Main Findings <sup>a</sup>          |
|------------------------------|----------------|-------------------------------------|-----------------------|----------------------------------|----------------------------|----------------------------------------|-------------------------------------|
|                              |                |                                     |                       |                                  | Measurements               | Types                                  |                                     |
| <b>Cross-sectional study</b> |                |                                     |                       |                                  |                            |                                        |                                     |
| Mahabee-Gittens (2020)       | 2016-2017      | 21,539 (6-11 yrs)                   | The USA               | Parental report                  | Questionnaires (Current)   | no exposure                            | Ref                                 |
|                              |                |                                     |                       |                                  |                            | household smoker with no home exposure | <b>1.44 (1.27–1.63)</b>             |
|                              |                |                                     |                       |                                  |                            | household smoker with home exposure    | <b>1.65 (1.24–2.19)</b>             |
| Wang (2019)                  | 2014.6         | 15,344 (9 yrs)                      | Shanghai, China       | Rating scale (SDQ)               | Questionnaires (Current)   | None                                   | <b>Ref</b>                          |
|                              |                |                                     |                       |                                  |                            | < 1 h/daily                            | <b>1.08 (0.14, 2.01)</b>            |
|                              |                |                                     |                       |                                  |                            | 1–2 h/daily                            | <b>1.18 (0.20, 2.16)</b>            |
|                              |                |                                     |                       |                                  |                            | ≥3 h/daily                             | <b>1.02 (0.06, 1.99)</b>            |
| Padrón (2015)                | 2011-2012      | 2357 (4-12 yrs)                     | Spain                 | Rating scale (SDQ)               | Questionnaires (Current)   | not habitually exposed                 | Ref                                 |
|                              |                |                                     |                       |                                  |                            | <1 h/day                               | <b>2.18 (1.30–3.64)</b>             |
|                              |                |                                     |                       |                                  |                            | ≥1 h/day                               | <b>3.14 (1.63–6.04)</b>             |
| Shiue (2015)                 | 2013           | 1,019 (4-12 yrs)                    | Scotland              | Rating scale (SDQ)               | Questionnaires (Current)   | Not allowed                            | Ref                                 |
|                              |                |                                     |                       |                                  |                            | Anywhere                               | <b>3.86 (1.17–12.72)</b>            |
|                              |                |                                     |                       |                                  |                            | Some areas                             | <b>2.85 (1.34–6.05)</b>             |
|                              |                |                                     |                       |                                  |                            | Outdoor areas                          | 1.78 (0.92–3.50)                    |
| Bauer (2014)                 | 2004.11-2012-6 | 2,441 (0-6 yrs)                     | Indianapolis, the USA | Electronic health record (ICD-9) | Questionnaires (Current)   | Yes (Ref: No)                          | <b>1.9 (1.2–3.1)</b>                |
| Max (2013)                   | 1999-2004      | 6283/6033 (4-15 yrs)                | Seattle, the USA      | Parental report                  | Questionnaires (Current)   | Yes (Ref: No)                          | <b>1.5 (1.1–2.0)</b>                |
|                              |                |                                     |                       |                                  | Serum cotinine (Current)   | Yes (Ref: No)                          | <b>1.8 (1.3–2.5)</b>                |
| Kabir (2011)                 | 2007.4-2008.7  | 55,358 (0-11 yrs)                   | The USA               | Parental report                  | Questionnaires (Current)   | Yes (Ref: No)                          | <b>1.44 (1.21–1.72)</b>             |
| Twardella (2010)             | 2005-2006      | 5,494 (5-7 yrs)                     | Bavaria, Germany      | Rating scale (SDQ)               | Questionnaires (Postnatal) | Yes (Ref: No)                          | <b>2.39 (1.62–3.53)</b>             |
| Bandiera (2011)              | 2001-2004      | 2,901 (8-15 yrs)                    | The USA               | Rating scales (DSM-IV)           | Serum cotinine (Current)   | NA                                     | <b>0.40 (0.24–0.56)<sup>a</sup></b> |
|                              |                |                                     |                       | Diagnosis (DSM-IV)               |                            |                                        |                                     |
| Braun (2006)                 | 1999-2002      | 3,879 (4015 yrs)                    | The USA               | Parental report                  | Questionnaires (Prenatal)  | Yes (Ref: No)                          | <b>2.5 (1.2–5.2)</b>                |
|                              |                |                                     |                       |                                  | Questionnaires (Postnatal) | Yes (Ref: No)                          | 0.6 (0.3–1.3)                       |
| <b>Case-control study</b>    |                |                                     |                       |                                  |                            |                                        |                                     |
| Kim (2018)                   | 2017.1-2017.12 | Case: 200<br>Control: 253 (6-9 yrs) | Cheonan, Korea        | Diagnosis (DSM-IV)               | Urine cotinine (Current)   | NA                                     | <b>1.55 (1.05–2.30)</b>             |
| Joo                          | 2008-          | Case: 214                           | Cheonan, Korea        | Diagnosis                        | Urine cotinine (Current)   | NA                                     | <b>1.10 (1.03–1.16)</b>             |

|                     |                         |                                        |                                                   |                                                  |                                                          |                                                             |                         |
|---------------------|-------------------------|----------------------------------------|---------------------------------------------------|--------------------------------------------------|----------------------------------------------------------|-------------------------------------------------------------|-------------------------|
| (2017)              | 2010                    | Control: 214<br>(6-10 yrs)             |                                                   | (DSM-IV)                                         | Questionnaires (Prenatal)                                | Yes (Ref: No)                                               | <b>1.67 (1.08–2.58)</b> |
|                     |                         |                                        |                                                   |                                                  | Questionnaires (Postnatal)                               | Yes (Ref: No)                                               | <b>1.83 (1.15–2.91)</b> |
|                     |                         |                                        |                                                   |                                                  | Questionnaires<br>(Pre-and postnatal)                    | Both yes (Ref: Both No)                                     | <b>2.41 (1.20–4.81)</b> |
| Yoshimasu<br>(2009) | 2006.3-<br>2008.12      | Case: 90<br>Control: 270<br>(6-15 yrs) | Kinki,<br>Japan                                   | Diagnosis<br>(DSM-IV)                            | Questionnaires (Prenatal)                                | Yes (Ref: No)                                               | 1.0 (0.4–2.3)           |
| <b>Cohort study</b> |                         |                                        |                                                   |                                                  |                                                          |                                                             |                         |
| Minatoya<br>(2019)  | 2008.4-<br>2017.5       | 3,216<br>(5 yrs)                       | Hokkaido,<br>Japan                                | Rating scale<br>(SDQ)                            | Blood cotinine<br>(Prenatal)                             | ≤ 0.21 ng/ml                                                | Ref                     |
|                     |                         |                                        |                                                   |                                                  |                                                          | 0.22–0.51 ng/ml (low passive)                               | 1.23 (0.89–1.69)        |
|                     |                         |                                        |                                                   |                                                  |                                                          | 0.52–11.48 ng/ml (high passive)                             | 1.15 (0.82–1.60)        |
|                     |                         |                                        |                                                   |                                                  |                                                          | ≥ 11.49 ng/ml (active)                                      | 1.49 (1.00–2.23)        |
| Downey<br>(2015)    | 2002-2004               | 826<br>(2 yrs)                         | the USA                                           | Rating scale<br>(CBCL and<br>ADHD <sup>P</sup> ) | Questionnaires<br>(Prenatal)                             | Yes (Ref: No)                                               | <b>1.9 (1.2–3.2)</b>    |
|                     |                         |                                        |                                                   |                                                  |                                                          | Yes (Ref: No)                                               | <b>2.4 (1.4–4.2)</b>    |
| Leung<br>(2015)     | 1997.4-<br>2012.8       | 7,914<br>(7-12 yrs)                    | Hong Kong,<br>China                               | Rating scale<br>(RPRS)                           | Questionnaires<br>(Different period)                     | No prenatal and no postnatal exposure                       | Ref                     |
|                     |                         |                                        |                                                   |                                                  |                                                          | Only occasional prenatal exposure from non-parental sources | 0.07 (-0.04–0.17)       |
|                     |                         |                                        |                                                   |                                                  |                                                          | Only daily prenatal exposure from non-parental sources      | 0.04 (-0.21–0.30)       |
|                     |                         |                                        |                                                   |                                                  |                                                          | Only postnatal exposure from non-parental sources           | 0.18 (-0.14–0.49)       |
| Langley<br>(2012)   | From<br>1991.4.1        | 5,719<br>(7.5 yrs)                     | Avon,<br>the UK                                   | Rating scale<br>(DAWBA)                          | Questionnaires (Prenatal)                                | Paternal smoking & nonsmoking mother (Ref: No)              | <b>0.12 (0.04–0.20)</b> |
|                     |                         |                                        |                                                   |                                                  | Questionnaires (Prenatal)                                | Household passive smoking & nonsmoking parents (Ref: No)    | 0.13 (-0.13–0.39)       |
|                     |                         |                                        |                                                   |                                                  | Questionnaires (Prenatal)                                | Workplace passive smoking and nonsmoking parents (Ref: No)  | 0.04 (-0.16–0.25)       |
|                     |                         |                                        |                                                   | Diagnosis<br>(DSM-IV)                            | Questionnaires (Prenatal)                                | Yes (Ref: No)                                               | 1.43 (0.98–2.07)        |
| Tiesler<br>(2011)   | 1997-<br>2009           | 1,654<br>(10 yrs)                      | Munich, Leipzig, Wesel<br>and Bad Honnef, Germany | Rating scale<br>(SDQ)                            | Questionnaires<br>(Different period)                     | Never                                                       | Ref                     |
|                     |                         |                                        |                                                   |                                                  |                                                          | Only prenatal                                               | <b>1.59 (1.11–2.27)</b> |
|                     |                         |                                        |                                                   |                                                  |                                                          | Only postnatal                                              | <b>1.59 (1.11–2.27)</b> |
|                     |                         |                                        |                                                   |                                                  |                                                          | Pre-and postnatal                                           | <b>1.77 (1.11–2.84)</b> |
|                     |                         |                                        |                                                   |                                                  | Questionnaires<br>(Different period, non-smoker mothers) | Never                                                       | Ref                     |
|                     |                         |                                        |                                                   |                                                  |                                                          | Only prenatal                                               | 1.41 (0.79–2.52)        |
|                     |                         |                                        |                                                   |                                                  |                                                          | Only postnatal                                              | 1.41 (0.79–2.52)        |
| Pre-and postnatal   | <b>1.97 (1.06–3.65)</b> |                                        |                                                   |                                                  |                                                          |                                                             |                         |
| Rückinger<br>(2010) | 1995.9-<br>2008.7       | 2,862<br>(10 yrs)                      | Munich and Wesel,<br>Germany                      | Rating scale<br>(SDQ)                            | Questionnaires<br>(Different period)                     | Never                                                       | Ref                     |
|                     |                         |                                        |                                                   |                                                  |                                                          | Only prenatal                                               | 1.1 (0.5-2.7)           |

|               |               |                |                  |                       |                                |                   |                          |
|---------------|---------------|----------------|------------------|-----------------------|--------------------------------|-------------------|--------------------------|
|               |               |                |                  |                       |                                | Only postnatal    | 1.2 (0.9-1.6)            |
|               |               |                |                  |                       |                                | Pre-and postnatal | <b>1.8 (1.3-2.6)</b>     |
|               |               |                |                  |                       | Questionnaires<br>(Prenatal)   | Never             | 1 Ref                    |
|               |               |                |                  |                       |                                | Low intensity     | 0.4 (0.1-3.0)            |
|               |               |                |                  |                       |                                | High intensity    | 1.9 (0.6-6.0)            |
| Luk<br>(2018) | 2012-<br>2015 | 189<br>(3 yrs) | Hong Kong, China | Rating scale<br>(SDQ) | Saliva cotinine<br>(postnatal) | NA                | <b>1.02 (0.06, 1.99)</b> |

Abbreviations: SHS, secondhand smoke; ADHD, attention-deficit/hyperactivity disorder; ICD-9, International Classification of Diseases Ninth Revision; DSM-IV, The Diagnostic and Statistical Manual of Mental Disorders, Fourth Edition; ADHD<sup>p</sup>, attention problems and Diagnostic and Statistical Manual of Mental Disorders-compatible attention deficit/hyperactivity problems; CBCL, The Child Behavior Checklist; RPRS, Revised Parent's Rutter Scales; DAWBA, Development and Well-Being Assessment.

<sup>a</sup> The results were expressed as beta (95%CI) or odd ratios (95%CI).

**eTable 2. The Associations of SHS Exposure With ADHD Symptoms and Subtypes in School-Aged Children (6-18 Years) Using the Cutoff of C-ASQ<sup>a, b</sup>**

| SHS exposure                                               | ADHD (C-ASQ)      |         |
|------------------------------------------------------------|-------------------|---------|
|                                                            | OR (95% CI)       | P value |
| Prenatal exposed                                           |                   |         |
| No                                                         | 1 [Reference]     |         |
| Yes                                                        | 2.17 (1.89, 2.48) | <0.001  |
| Postnatal exposed                                          |                   |         |
| No                                                         | 1 [Reference]     |         |
| Yes                                                        | 1.74 (1.45, 2.09) | <0.001  |
| Current exposed                                            |                   |         |
| No                                                         | 1 [Reference]     |         |
| Yes                                                        | 1.14 (0.99, 1.31) | 0.06    |
| From birth to childhood                                    |                   |         |
| Unexposed                                                  | 1 [Reference]     |         |
| Ever exposed                                               | 1.59 (1.38, 1.83) | <0.001  |
| Always exposed                                             | 2.65 (2.22, 3.16) | <0.001  |
| Current paternal smoking at weekdays (No. of cigarettes/d) |                   |         |
| 0                                                          | 1 [Reference]     |         |
| 1~5                                                        | 1.22 (1.05, 1.42) | 0.01    |
| 5~10                                                       | 1.62 (1.29, 2.02) | <0.001  |
| ≥10                                                        | 1.44 (1.20, 1.74) | <0.001  |
| Current paternal smoking at weekends (No. of cigarettes/d) |                   |         |
| 0                                                          | 1 [Reference]     |         |
| 1~5                                                        | 1.18 (0.99, 1.39) | 0.06    |
| 5~10                                                       | 1.42 (1.18, 1.72) | <0.001  |
| ≥10                                                        | 1.53 (1.27, 1.83) | <0.001  |

Abbreviations: ADHD, attention-deficit/hyperactivity disorder; C-ASQ, Conners Abbreviated Symptom Questionnaire; CI, confidence interval; OR, odd ratios; SHS, secondhand smoke.

<sup>a</sup> The Conners Abbreviated Symptom Questionnaire is a set of ten checklist items rated on a 4-point Likert scale: 0 = never or rare; 1 = sometimes; 2 = often and 3 = very often. The Conners Hyperkinesia Index is a sum of the total score ranged from zero to thirty, and a score greater than fifteen was defined as having ADHD symptoms.

<sup>b</sup> The results were shown using the adjusted models with the adjustment of school-level random intercepts, child age, sex, only child, preterm birth and low birth weight, parental educational levels, yearly household income, maternal age, current and prenatal maternal smoking and prenatal maternal alcohol consumption.

**eTable 3. The Associations of SHS Exposure From Pregnancy to Childhood With ADHD Symptoms and Subtypes in School-Aged Children (6-18 Years) Using DSM-5 Criteria<sup>a, b</sup>**

| ADHD symptom or subtype | Adjusted model <sup>b</sup> |         |
|-------------------------|-----------------------------|---------|
|                         | OR (95% CI)                 | P value |
| ADHD symptom (DSM-5)    |                             |         |
| Unexposed               | 1 [Reference]               |         |
| Ever exposed            | 1.45 (1.36, 1.54)           | <0.001  |
| Always exposed          | 2.50 (2.31, 2.72)           | <0.001  |
| ADHD-HI subtype (DSM-5) |                             |         |
| Unexposed               | 1 [Reference]               |         |
| Ever exposed            | 1.58 (1.23, 2.03)           | <0.001  |
| Always exposed          | 2.10 (1.47, 2.99)           | <0.001  |
| ADHD-I subtype (DSM-5)  |                             |         |
| Unexposed               | 1 [Reference]               |         |
| Ever exposed            | 1.40 (1.31, 1.50)           | <0.001  |
| Always exposed          | 2.38 (2.17, 2.60)           | <0.001  |
| ADHD-C subtype (DSM-5)  |                             |         |
| Unexposed               | 1 [Reference]               |         |
| Ever exposed            | 1.66 (1.45, 1.90)           | <0.001  |
| Always exposed          | 3.24 (2.73, 3.84)           | <0.001  |

Abbreviations: ADHD, attention-deficit/hyperactivity disorder; ADHD-C, ADHD with combined symptoms of inattention and hyperactivity-impulsivity; ADHD-HI, ADHD with symptoms of hyperactivity-impulsivity; ADHD-I, ADHD with symptoms of inattention; CI, confidence interval; DSM-5, the Diagnostic and Statistical Manual of Mental Disorders-Fifth Edition; OR, odd ratios; SHS, secondhand smoke.

<sup>a</sup> The definition of ADHD using the DSM-5 criteria could be defined using the Chinese version of the symptom inventory scale of ADHD. Children with ADHD symptoms were defined as presenting often or very often with 5 or more symptoms of inattention, or more symptoms of hyperactivity-impulsivity, or both. The ADHD symptom were further classified into 3 subtypes: ADHD-I, defined as presenting often or very often with 5 or more symptoms of inattention; ADHD-HI, defined as presenting often or very often with 5 or more symptoms of hyperactivity-impulsivity; and ADHD-C, defined as presenting often or very often with 5 or more symptoms of both inattention and 5 or more symptoms of hyperactivity-impulsivity.

<sup>b</sup> The results were shown using the adjusted models with the adjustment of school-level random intercepts, child age, sex, only child, preterm birth and low birth weight, parental educational levels, yearly household income, maternal age, current and prenatal maternal smoking and prenatal maternal alcohol consumption.

**eTable 4. The Associations of SHS Exposure With ADHD Symptoms and Subtypes In Different Timing In School-Aged Children (6-18 Years) Using DSM-5 Criteria<sup>a, b</sup>**

| Exposure windows of SHS                    | Adjusted model <sup>b</sup> |         |
|--------------------------------------------|-----------------------------|---------|
|                                            | OR (95% CI)                 | P value |
| Prenatal (reference: prenatal unexposed)   |                             |         |
| ADHD symptom (DSM-5)                       | 2.01 (1.88, 2.14)           | <0.001  |
| ADHD-HI subtype (DSM-5)                    | 1.55 (1.18, 2.03)           | <0.001  |
| ADHD-I subtype (DSM-5)                     | 1.93 (1.80, 2.07)           | <0.001  |
| ADHD-C subtype (DSM-5)                     | 2.49 (2.19, 2.84)           | <0.001  |
| Postnatal (reference: postnatal unexposed) |                             |         |
| ADHD symptom (DSM-5)                       | 1.52 (1.40, 1.66)           | <0.001  |
| ADHD-HI subtype (DSM-5)                    | 2.21 (1.59, 3.08)           | <0.001  |
| ADHD-I subtype (DSM-5)                     | 1.48 (1.35, 1.63)           | <0.001  |
| ADHD-C subtype (DSM-5)                     | 1.56 (1.30, 1.87)           | <0.001  |
| Current (reference: current unexposed)     |                             |         |
| ADHD symptom (DSM-5)                       | 1.21 (1.14, 1.28)           | <0.001  |
| ADHD-HI subtype (DSM-5)                    | 1.27 (0.99, 1.63)           | 0.06    |
| ADHD-I subtype (DSM-5)                     | 1.20 (1.12, 1.28)           | <0.001  |
| ADHD-C subtype (DSM-5)                     | 1.21 (1.06, 1.38)           | <0.001  |

ADHD, attention-deficit/hyperactivity disorder; ADHD-C, ADHD with combined symptoms of inattention and hyperactivity-impulsivity; ADHD-HI, ADHD with symptoms of hyperactivity-impulsivity; ADHD-I, ADHD with symptoms of inattention; CI, confidence interval; DSM-5, the Diagnostic and Statistical Manual of Mental Disorders-Fifth Edition; OR, odd ratios; SHS, secondhand smoke.

<sup>a</sup> The definition of ADHD using the DSM-5 criteria could be defined using the Chinese version of the symptom inventory scale of ADHD. Children with ADHD symptoms were defined as presenting often or very often with 5 or more symptoms of inattention, or more symptoms of hyperactivity-impulsivity, or both. The ADHD symptom were further classified into 3 subtypes: ADHD-I, defined as presenting often or very often with 5 or more symptoms of inattention; ADHD-HI, defined as presenting often or very often with 5 or more symptoms of hyperactivity-impulsivity; and ADHD-C, defined as presenting often or very often with 5 or more symptoms of both inattention and 5 or more symptoms of hyperactivity-impulsivity.

<sup>b</sup> The results were shown using the adjusted models with the adjustment of school-level random intercepts, child age, sex, only child, preterm birth and low birth weight, parental educational levels, yearly household income, maternal age, current and prenatal maternal smoking and prenatal maternal alcohol consumption.

**eTable 5. The Associations of Current Paternal Smoking and ADHD Symptoms and Subtypes in School-Aged Children (6-18 Years) Using DSM-5 Criteria<sup>a, b</sup>**

| Numbers of cigarettes per day | Weekdays          |         | Weekends          |         |
|-------------------------------|-------------------|---------|-------------------|---------|
|                               | OR (95% CI)       | P Value | OR (95% CI)       | P Value |
| ADHD symptom (DSM-5)          |                   |         |                   |         |
| 0                             | 1 [Reference]     |         | 1 [Reference]     |         |
| 1 to <5                       | 1.31 (1.22, 1.40) | <0.001  | 1.23 (1.15, 1.33) | <0.001  |
| 5 to <10                      | 1.45 (1.30, 1.61) | <0.001  | 1.45 (1.34, 1.58) | <0.001  |
| ≥10                           | 1.40 (1.29, 1.52) | <0.001  | 1.45 (1.34, 1.58) | <0.001  |
| ADHD-HI subtype (DSM-5)       |                   |         |                   |         |
| 0                             | 1 [Reference]     |         | 1 [Reference]     |         |
| 1 to <5                       | 1.50 (1.14, 1.97) | <0.001  | 1.49 (1.11, 2.01) | 0.01    |
| 5 to <10                      | 1.69 (1.10, 2.59) | 0.02    | 1.45 (1.02, 2.06) | 0.04    |
| ≥10                           | 1.47 (1.04, 2.08) | 0.03    | 1.64 (1.17, 2.29) | <0.001  |
| ADHD-I subtype (DSM-5)        |                   |         |                   |         |
| 0                             | 1 [Reference]     |         | 1 [Reference]     |         |
| 1 to <5                       | 1.31 (1.22, 1.41) | <0.001  | 1.24 (1.14, 1.34) | <0.001  |
| 5 to <10                      | 1.40 (1.24, 1.58) | <0.001  | 1.44 (1.31, 1.58) | <0.001  |
| ≥10                           | 1.36 (1.24, 1.50) | <0.001  | 1.40 (1.28, 1.54) | <0.001  |
| ADHD-C subtype (DSM-5)        |                   |         |                   |         |
| 0                             | 1 [Reference]     |         | 1 [Reference]     |         |
| 1 to <5                       | 1.24 (1.07, 1.44) | <0.001  | 1.14 (0.97, 1.35) | 0.12    |
| 5 to <10                      | 1.61 (1.29, 2.01) | <0.001  | 1.49 (1.24, 1.78) | <0.001  |
| ≥10                           | 1.53 (1.28, 1.82) | <0.001  | 1.64 (1.38, 1.95) | <0.001  |

Abbreviations: ADHD, attention-deficit/hyperactivity disorder; ADHD-C, ADHD with combined symptoms of inattention and hyperactivity-impulsivity; ADHD-HI, ADHD with symptoms of hyperactivity-impulsivity; ADHD-I, ADHD with symptoms of inattention; CI, confidence interval; DSM-5, the Diagnostic and Statistical Manual of Mental Disorders-Fifth Edition; OR, odd ratios; SHS, secondhand smoke.

<sup>a</sup> The definition of ADHD using the DSM-5 criteria could be defined using the Chinese version of the symptom inventory scale of ADHD. Children with ADHD symptoms were defined as presenting often or very often with 5 or more symptoms of inattention, or more symptoms of hyperactivity-impulsivity, or both. The ADHD symptom were further classified into 3 subtypes: ADHD-I, defined as presenting often or very often with 5 or more symptoms of inattention; ADHD-HI, defined as presenting often or very often with 5 or more symptoms of hyperactivity-impulsivity; and ADHD-C, defined as presenting often or very often with 5 or more symptoms of both inattention and 5 or more symptoms of hyperactivity-impulsivity

<sup>b</sup> The results were shown using the adjusted models with the adjustment of school-level random intercepts, child age, sex, only child, preterm birth and low birth weight, parental educational levels, yearly household income, maternal age, current and prenatal maternal smoking and prenatal maternal alcohol consumption.



**eTable 6. The Associations of SHS Exposure From Pregnancy to Childhood With ADHD Symptoms and Subtypes in School-Aged Children (6-18 Years) Using the Continuous Scores of the Symptom Inventory Scale of ADHD and C-ASQ <sup>a</sup>**

| ADHD symptoms and subtypes       | Adjusted model <sup>b</sup> |                |
|----------------------------------|-----------------------------|----------------|
|                                  | Estimates (95% CI)          | <i>P</i> value |
| ADHD symptoms total score        |                             |                |
| Unexposed                        | 1 [Reference]               |                |
| Ever exposed                     | 1.58 (1.44, 1.72)           | <0.001         |
| Always exposed                   | 3.62 (3.39, 3.84)           | <0.001         |
| Inattention sub-scores           |                             |                |
| Unexposed                        | 1 [Reference]               |                |
| Ever exposed                     | 0.98 (0.89, 1.07)           | <0.001         |
| Always exposed                   | 2.32 (2.17, 2.46)           | <0.001         |
| hyperactive/impulsive sub-scores |                             |                |
| Unexposed                        | 1 [Reference]               |                |
| Ever exposed                     | 0.60 (0.54, 0.66)           | <0.001         |
| Always exposed                   | 1.30 (1.20, 1.40)           | <0.001         |
| C-ASQ score                      |                             |                |
| Unexposed                        | 1 [Reference]               |                |
| Ever exposed                     | 0.78 (0.71, 0.86)           | <0.001         |
| Always exposed                   | 1.76 (1.63, 1.88)           | <0.001         |
| C-ASQ Z-score                    |                             |                |
| Unexposed                        | 1 [Reference]               |                |
| Ever exposed                     | 0.08 (0.07, 0.09)           | <0.001         |
| Always exposed                   | 0.18 (0.16, 0.19)           | <0.001         |

Abbreviations: ADHD, attention-deficit/hyperactivity disorder; CI, confidence interval; OR, odd ratios; SHS, secondhand smoke.

<sup>a</sup> The results were shown using the adjusted models with the adjustment of school-level random intercepts, child age, sex, only child, preterm birth and low birth weight, parental educational levels, yearly household income, maternal age, current and prenatal maternal smoking and prenatal maternal alcohol consumption.

**eTable 7. The Associations of SHS Exposure With ADHD Symptoms and Subtypes in Different Timing in School-Aged Children (6-18 Years) Using the Continuous Scores of the Symptom Inventory Scale of ADHD and C-ASQ <sup>a</sup>**

| ADHD symptoms and subtypes                 | Adjusted model <sup>b</sup> |         |
|--------------------------------------------|-----------------------------|---------|
|                                            | Estimates (95%CI)           | P value |
| Prenatal (reference: prenatal unexposed)   |                             |         |
| ADHD symptoms total score                  | 2.67 (2.50, 2.84)           | <0.001  |
| Inattention sub-scores                     | 1.71 (1.61, 1.82)           | <0.001  |
| hyperactive/impulsive sub-scores           | 0.96 (0.88, 1.03)           | <0.001  |
| C-ASQ score                                | 1.33 (1.24, 1.43)           | <0.001  |
| C-ASQ Z-score                              | 0.13 (0.12, 0.14)           | <0.001  |
| Postnatal (reference, postnatal unexposed) |                             |         |
| ADHD symptoms total score                  | 1.83 (1.62, 2.05)           | <0.001  |
| Inattention sub-scores                     | 1.13 (1.00, 1.27)           | <0.001  |
| hyperactive/impulsive sub-scores           | 0.70 (0.60, 0.79)           | <0.001  |
| C-ASQ score                                | 0.92 (0.80, 1.04)           | <0.001  |
| C-ASQ Z-score                              | 0.09 (0.08, 0.10)           | <0.001  |
| Current (reference: current unexposed)     |                             |         |
| ADHD symptoms total score                  | 0.90 (0.76, 1.04)           | <0.001  |
| Inattention sub-scores                     | 0.56 (0.47, 0.65)           | <0.001  |
| hyperactive/impulsive sub-scores           | 0.34 (0.28, 0.40)           | <0.001  |
| C-ASQ score                                | 0.41 (0.33, 0.49)           | <0.001  |
| C-ASQ Z-score                              | 0.04 (0.03, 0.05)           | <0.001  |

Abbreviations: ADHD, attention-deficit/hyperactivity disorder; CI, confidence interval; OR, odd ratios; SHS, secondhand smoke.

<sup>a</sup> The results were shown using the adjusted models with the adjustment of school-level random intercepts, child age, sex, only child, preterm birth and low birth weight, parental educational levels, yearly household income, maternal age, current and prenatal maternal smoking and prenatal maternal alcohol consumption.

**eTable 8. The Associations of Current Paternal Smoking and ADHD Symptoms and Subtypes in School-Aged Children (6-18 Years) Using the Continuous Scores of the Symptom Inventory Scale of ADHD and C-ASQ<sup>a</sup>**

| Numbers of cigarettes per day           | Weekdays          |         | Weekends          |         |
|-----------------------------------------|-------------------|---------|-------------------|---------|
|                                         | Estimates (95%CI) | P value | Estimates (95%CI) | P value |
| <b>ADHD symptoms total score</b>        |                   |         |                   |         |
| 0                                       | 1 [Reference]     |         | 1 [Reference]     |         |
| 1 to <5                                 | 1.30 (1.14, 1.47) | <0.001  | 1.15 (0.97, 1.32) | <0.001  |
| 5 to <10                                | 1.47 (1.19, 1.74) | <0.001  | 1.48 (1.27, 1.69) | <0.001  |
| ≥10                                     | 1.31 (1.10, 1.52) | <0.001  | 1.47 (1.26, 1.69) | <0.001  |
|                                         |                   |         |                   |         |
| <b>Inattention sub-scores</b>           |                   |         |                   |         |
| 0                                       | 1 [Reference]     |         | 1 [Reference]     |         |
| 1 to <5                                 | 0.84 (0.73, 0.94) | <0.001  | 0.73 (0.62, 0.85) | <0.001  |
| 5 to <10                                | 0.90 (0.73, 1.08) | <0.001  | 0.95 (0.81, 1.08) | <0.001  |
| ≥10                                     | 0.84 (0.71, 0.98) | <0.001  | 0.94 (0.80, 1.07) | <0.001  |
|                                         |                   |         |                   |         |
| <b>hyperactive/impulsive sub-scores</b> |                   |         |                   |         |
| 0                                       | 1 [Reference]     |         | 1 [Reference]     |         |
| 1 to <5                                 | 0.47 (0.40, 0.54) | <0.001  | 0.41 (0.34, 0.49) | <0.001  |
| 5 to <10                                | 0.56 (0.44, 0.68) | <0.001  | 0.53 (0.44, 0.62) | <0.001  |
| ≥10                                     | 0.46 (0.37, 0.55) | <0.001  | 0.54 (0.44, 0.63) | <0.001  |
|                                         |                   |         |                   |         |
| <b>C-ASQ score</b>                      |                   |         |                   |         |
| 0                                       | 1 [Reference]     |         | 1 [Reference]     |         |
| 1 to <5                                 | 0.61 (0.52, 0.70) | <0.001  | 0.53 (0.44, 0.63) | <0.001  |
| 5 to <10                                | 0.74 (0.59, 0.89) | <0.001  | 0.71 (0.59, 0.82) | <0.001  |
| ≥10                                     | 0.62 (0.51, 0.74) | <0.001  | 0.72 (0.60, 0.84) | <0.001  |
|                                         |                   |         |                   |         |
| <b>C-ASQ Z-score</b>                    |                   |         |                   |         |
| 0                                       | 1 [Reference]     |         | 1 [Reference]     |         |
| 1 to <5                                 | 0.06 (0.05, 0.07) | <0.001  | 0.05 (0.04, 0.06) | <0.001  |
| 5 to <10                                | 0.07 (0.06, 0.09) | <0.001  | 0.07 (0.06, 0.08) | <0.001  |
| ≥10                                     | 0.06 (0.05, 0.07) | <0.001  | 0.07 (0.06, 0.08) | <0.001  |

Abbreviations: ADHD, attention-deficit/hyperactivity disorder; CI, confidence interval; OR, odd ratios.

<sup>a</sup> The results were shown using the adjusted models with the adjustment of school-level random intercepts, child age, sex, only child, preterm birth and low birth weight, parental educational levels, yearly household income, maternal age, current and prenatal maternal smoking and prenatal maternal alcohol consumption.

**eTable 9. The Associations of SHS Exposure in Different Timing With ADHD Symptom and Subtypes in School-Aged Children (6-18 Years) <sup>a, b</sup>**

| SHS exposure                        | OR (95%CI)        |                   |                   |                   |
|-------------------------------------|-------------------|-------------------|-------------------|-------------------|
|                                     | ADHD              | ADHD-HI           | ADHD-I            | ADHD-C            |
| Never exposed                       | 1 [Reference]     | 1 [Reference]     | 1 [Reference]     | 1 [Reference]     |
| Only current exposed                | 1.24 (1.10, 1.40) | 1.49 (0.84, 2.63) | 1.21 (1.06, 1.38) | 1.39 (1.00, 1.94) |
| <i>P</i> value                      | <0.001            | 0.17              | <0.001            | 0.05              |
| Only postnatal exposed              | 1.71 (1.28, 2.29) | 2.68 (0.81, 8.88) | 1.59 (1.15, 2.20) | 2.20 (1.06, 4.55) |
| <i>P</i> value                      | <0.001            | 0.11              | <0.001            | 0.03              |
| Only postnatal and current exposed  | 1.63 (1.32, 2.00) | 3.24 (1.47, 7.14) | 1.48 (1.17, 1.88) | 2.19 (1.30, 3.70) |
| <i>P</i> value                      | <0.001            | <0.001            | <0.001            | <0.001            |
| Only prenatal exposed               | 2.00 (1.53, 2.63) | 2.57 (0.78, 8.48) | 2.09 (1.57, 2.79) | 1.13 (0.41, 3.08) |
| <i>P</i> value                      | <0.001            | 0.12              | <0.001            | 0.81              |
| Only prenatal and current exposed   | 1.95 (1.54, 2.48) | 1.93 (0.58, 6.34) | 2.00 (1.55, 2.59) | 1.65 (0.80, 3.40) |
| <i>P</i> value                      | <0.001            | 0.28              | <0.001            | 0.18              |
| Only prenatal and postnatal exposed | 2.36 (1.93, 2.88) | 4.34 (1.95, 9.66) | 2.22 (1.79, 2.77) | 2.75 (1.62, 4.66) |
| <i>P</i> value                      | <0.001            | <0.001            | <0.001            | <0.001            |
| Always exposed                      | 2.89 (2.56, 3.26) | 2.45 (1.30, 4.65) | 2.90 (2.54, 3.30) | 2.96 (2.11, 4.15) |
| <i>P</i> value                      | <0.001            | 0.01              | <0.001            | <0.001            |

Abbreviations: ADHD, attention-deficit/hyperactivity disorder; ADHD-C, ADHD with combined symptoms of inattention and hyperactivity-impulsivity; ADHD-HI, ADHD with symptoms of hyperactivity-impulsivity; ADHD-I, ADHD with symptoms of inattention; CI, confidence interval; OR, odd ratios; SHS, secondhand smoke.

<sup>a</sup> The Chinese version of the symptom inventory scale of ADHD consists of 18 queries categorized as 9 symptoms of inattention and 9 symptoms of hyperactivity-impulsivity. Each item or symptom was rated on a 4-point Likert scale (0 = never or rare; 1 = sometimes; 2 = often and 3 = very often). Children with ADHD

symptoms were defined as presenting often or very often with 6 or more symptoms of inattention, or more symptoms of hyperactivity-impulsivity, or both. The ADHD symptom were further classified into 3 subtypes: ADHD-I, defined as presenting often or very often with 6 or more symptoms of inattention; ADHD-HI, defined as presenting often or very often with 6 or more symptoms of hyperactivity-impulsivity; and ADHD-C, defined as presenting often or very often with 6 or more symptoms of both inattention and 6 or more symptoms of hyperactivity-impulsivity.

<sup>b</sup> The results were shown using the adjusted models with the adjustment of school-level random intercepts, child age, sex, only child, preterm birth and low birth weight, parental educational levels, yearly household income, maternal age, current and prenatal maternal smoking and prenatal maternal alcohol consumption.
